# Supplementary material for: Identification of potential biomarkers and therapeutic targets in the chronic obstructive pulmonary disease and acute myocardial infarction
Source: Research Square preprint supplement (doi:10.21203/rs.3.rs-166478/v1), 2021-02-08
Supplement: Supplementary file 3 [file c5b15e4a53cd90e86374c3e8.xlsx]

## Sheet: Sheet1
Gene.symbol
BANF1
PTTG1
KIAA0232
HDAC4
FGR
ATP5G1
MGST3
NAXE
DCTPP1
ZFP82
KIF1B
PYHIN1
RAD51C
RPS4X
PWP1
IL12RB1
PLBD1
ZNF746
ADA
PPIAL4A
NT5C2
FKBP11
EIF3I
NSMAF
IRAK3
APOL3
RGS2
NDEL1
TRPV2
ATP6V0B
MRPL24
DNAH5
COX10
SF3A3
PSME2
APH1B
THEM6
SVIL
LSS
RNF141
FBXL5
MRPS24
SAT1
DHRS3
OCIAD2
COPZ1
ILF2
DIRC2
APEX1
RASSF2
ARPC5L
HSDL2
IARS
CEBPB
PIGP
RTN3
PFKFB3
MIR181A2HG
ACOT4
MRPS9
PLEKHB1
DENND5A
SBNO2
RNF149
ITGAM
HIGD2A
EIF3D
NEDD9
PPP4R1
GZMK
LAT
TGFA
SLC2A3
PYGL
ACSL1
TSEN34
STMN1
CEBPD
CKS1B
SLC22A15
SNRPN
TLR8
MRPL14
SLA
MBOAT1
CSF2RA
QKI
ALOX5
CHST15
MGAM
SERINC1
SIRPA
PSMA5
CUTA
NCR3
ZNF275
APRT
DENND2D
IFNGR2
IMP4
SLAMF6
GPN1
ANPEP
MANSC1
TRIM44
ADGRG3
NME1
RHOC
ADAM7
MAN2A2
FLT3LG
LPIN2
B4GALT5
PLEKHF1
IL10RB
DDHD2
ZNF337
INPP5A
PLXDC2
TMEM99
RARRES3
IL18R1
KIAA0556
STK17B
MOSPD2
CHST13
ARG1
DNAJC9
LOC102724323
PISD
CEBPA
C9orf142
DUSP5
SLC26A8
RNASEL
DGCR6L
APMAP
ATP5G2
NDUFA12
GCA
C19orf70
IQSEC1
AKR1B1
LTB4R
VNN2
NFIL3
EOMES
POGLUT1
ZBTB4
RNF130
CLEC7A
SEPT6
SLC25A44
JUNB
MKNK1
SAMD3
LBR
CBL
SULT1B1
GNAI3
HECW2
FAM49A
PREX1
ICAM2
SYN2
SLC16A3
IL32
NOTCH1
NUMB
RAF1
DYNLL1
HK2
TNFRSF4
PFKFB4
HN1
PPP1R3D
AQP9
CXCR6
S1PR5
CPD
WDR54
RILPL1
LPAR2
C20orf24
ANKS1A
SKAP2
TTC4
CLDND2
KLRB1
CD40LG
HLA-DMA
GPAT3
CKAP4
CAMP
LAMP2
RPL14
RPUSD2
NCALD
MEGF9
LILRB3
PVRIG
SLC40A1
ZNF185
SBK1
LPGAT1
FCRL6
TMED3
RPAIN
CTBS
SLC37A3
TMUB2
KLHL8
MMP9
HSPE1
TRAPPC2B
RPS28
GALNT4
LAGE3
HAL
RPL18
TLR1
EMG1
OSBPL1A
CR1
EXOC6
BST1
QPCT
ACOX1
DNPH1
IFRD1
KLHL2
NACC2
LTA
TM9SF2
MGC57346
ITM2C
CLEC4F
CUX1
SDF2L1
CD40
STX3
PACSIN2
MAL
SNN
KRTCAP2
ADGRG5
OSBPL2
IL18BP
SLC38A1
CHST12
SERPINB1
CD55
EBNA1BP2
MAP2K4
MAEA
CELF2
GBGT1
C5AR1
ANXA3
BCL3
S100A12
TLR4
TBC1D14
TTC38
RAB27A
GPR141
PTPRE
FAM49B
TMEM238
RORA
IFNGR1
DDX24
HIP1
RAB3IP
NIPAL3
FYN
CSNK1D
GIMAP5
CD83
PELI2
TMEM55A
CCPG1
STX11
ECHDC2
MCEMP1
SNX27
HMGB2
RIT1
DYSF
MTMR6
CCDC92
HHEX
PTPRCAP
SLCO3A1
CSGALNACT2
LILRA2
MTFP1
CD3G
CYB561A3
MSRB1
CD302
PADI4
DEF8
SPNS3
CLEC4D
CD3E
QSOX1
USB1
SPI1
SAE1
SLAMF1
SIPA1L2
CD244
ID2
HK3
PRKCD
CA4
SMPDL3A
MAD1L1
LRWD1
SARM1
FAM159A
LILRB2
EIF4E3
RPL23AP64
NAMPT
MAP4K4
CYB5R4
ITFG2
HCST
NCF4
RBM47
LCK
PROK2
FEZ1
TSEN54
CCL5
MTMR3
FCAR
EEF2K
SKAP1
EIF3M
HMGCR
PNPLA7
OSM
TRIB1
TBC1D2
ZSWIM6
DYRK2
CSTA
PCED1B
SNU13
ITM2A
MATK
IRS2
NKG7
LDHB
FCGR3B
DBN1
C19orf12
OTX1
KCNJ15
C10orf54
GPR18
RPL4
HSD17B11
RPL24
TRIB2
ZNF281
ACSL4
KLRD1
SNRPF
ITPRIP
LAT2
ECHDC3
ATIC
TM6SF1
KLRG1
NADK
BCL2
ARHGAP9
SLC12A9
CLEC4E
RASSF1
LFNG
PGLYRP1
SLC24A4
TECR
ELOVL6
PGM2
RASGRP4
BOLA2
MORC2
GOT2
PFKFB2
SRPK1
PTEN
PRSS33
IMP3
E2F3
VMP1
UBE2B
TMCO3
MPZL2
C19orf35
ST6GALNAC2
DUSP1
SLC9A8
STXBP5
NPL
DRAM1
EIF3F
BMX
IMPDH2
OPLAH
PGS1
CSF3R
SMAD3
RNASE4
RBMS1
BASP1
TPD52L2
THOC3
GRAP
ADAM8
CCDC25
GAS7
GZMM
AES
C11orf1
KIAA0226L
FCGR2A
CHSY1
ZMYND15
TPCN2
HES6
IMPDH1
FAM126B
TRIM9
TUBB
RHOBTB3
BEST1
FBL
UBTD1
TSHZ3
MIF
CD3D
RP2
H2AFY
EVL
CTSS
PPP3CC
FRAT1
STAT3
FOS
DOK3
SLC22A4
FXYD5
ACSM3
TMEM14A
HIST2H2BE
EIF4B
ORM1
CD58
TLR2
SDCBP
SMARCD3
ANAPC1
CCND2
LRP10
ALOX5AP
LIME1
CEACAM4
CCDC167
NBEAL2
HSPA8
CD14
ST3GAL5
POLD2
FPR1
CRISPLD2
FCRL3
VPS51
ERGIC1
AGTRAP
TMEM71
USP10
PFKP
RPL36
LMNB1
CDK4
MTX1
F5
TMEM91
CASP4
UNG
HCK
TLR6
XPO6
HSD17B8
ALPL
SIRPB1
RAB33B
POLE3
MCOLN2
CYP4F22
ID3
ACVR1B
FBXL13
BTBD10
GNLY
C3orf62
DNAJA3
GPR160
PGD
C1RL
SFXN5
ZNF516
FRAT2
CECR6
MAPK1
SIRPG
FAM8A1
CBLB
FES
B4GALT3
IGF2R
PAQR8
RPL13AP6
SLC11A1
SDAD1
MAP4K1
RBP7
OSBPL8
PPP1R15A
HSP90AB1
ENTPD1
MAP3K2
MXD3
RPS13
FKBP5
TGM3
RASSF7
ACTL6A
LILRA5
ABHD14A
PHC2
HLA-DOB
SOD1
XBP1
SERPINA1
RAB31
P2RY10
MXD1
BCL6
MAPK3
SNURF
FAM53C
ERBB2
DNTTIP1
PRICKLE4
IKBIP
CHCHD10
BUB3
MPRIP
PRPF19
MSRA
CHI3L2
CDC25B
F2RL1
DGAT2
MAP3K4
MBOAT2
BOLA3
SUMF2
PAQR6
ARPC5
CD2
PIEZO1
MCM3
CD74
PLAUR
SNRPA1
CREB5
MIAT
MRPS33
FN3KRP
GPCPD1
RUNX3
GNG5
ARHGAP24
SLC16A5
CBS
VNN3
SEC61G
CD81
THOC5
IL18RAP
TMEM109
AGPAT2
EZR
LSMEM1
BCAS4
NLRC4
SQRDL
CLC
MDC1
VEGFB
ATP11B
ABHD5
CEP19
ELL
FLOT2
OLIG2
GIPC1
ELF2
GTPBP6
MSL3
PSTPIP2
PLXNC1
DENND3
OLFM4
PLSCR3
MBOAT7
LRP3
LIN7A
CEACAM1
PCNX1
SSBP4
EVI2A
LOC339059
GZMH
GAB2
AGTPBP1
FBXO31
ABHD2
NUP205
CPPED1
ATP6V0A1
RGL4
POR
DACH1
FAM212B
CDR2
CYFIP2
UBQLN4
RAB24
CD96
SRGN
CD160
CLEC5A
KIAA1551
GBP4
KBTBD7
AARS
CXCL16
HLA-DPA1
NMT2
GLRX
LY9
ERO1A
CTSZ
ITCH-IT1
FGFBP2
STAT4
LRBA
NDUFA3
ZBTB34
SAP30
CARS2
ST3GAL4
CRIP2
GYG1
CD7
PABPC4
NDUFB7
GZMA
ADCY4
PEA15
IL5RA
ZNF438
AP5B1
NFE2
CACNA1E
ANXA2R
CD52
STK3
MEFV
IL6R
OSCAR
NSUN7
HSP90B1
APAF1
EPRS
PPP2R2B
BIN1
BRI3
P2RX1
METRNL
NAIP
SLMAP
CYP4F3
CFAP44
DSE
ROPN1L
LRFN3
TP53I11
TIMP2
CARD16
RFX2
P2RY8
ARFIP1
EEF1G
ABTB1
ANKRD33
PILRA
CDK5R1
RPL37A
PHF21A
F12
NUP88
RPL10A
ZNF329
PTPN4
PCID2
BNIP2
CCL23
CYP1B1
CD247
PANX2
WDR6
FAR2
ZNF395
CFLAR
SLC25A42
FEM1C
GNB2
HLA-DOA
TOM1
CD93
USP5
TAF15
CD79B
CKAP5
HLA-DQB1
ZAP70
RNF13
ADM
FTH1
ITGB7
CLDN9
GPX7
CCNJL
PLCG1
PTBP3
CLTCL1
CNEP1R1
NLRP12
CITED4
PSORS1C1
SLC6A6
NCF2
H3F3C
TMEM88
MFSD14B
GPER1
NFKBIZ
PJA2
TNFSF13B
LACTB
MSRB2
SEMA4B
NECAB2
PELI1
SEPT1
CX3CR1
TCN1
NTNG2
ACTN1
HIST2H2AA3
NRBF2
ZDHHC18
HLA-DRA
TSC22D3
IL37
CMTM6
PTAFR
CXCR3
HNRNPD
STEAP4
LEF1
FAM102A
ACPP
NME8
NSFL1C
HIST1H2BC
ATP6V0E2
PDLIM7
IL2RB
IQGAP1
LAX1
ASPRV1
MARC1
CSF2RB
ETS2
REM2
TLE4
SORL1
MAP3K3
REPS2
SEMA3E
RPS27A
BMS1
LPAR5
RNF144B
KDM6B
ALDH3B1
C9orf72
MAPK14
MAK
FCMR
VPS9D1
GADD45A
ATG16L2
KAZN
RPL13A
CD6
CD8B
OLIG1
SAMSN1
GVINP1
PLPPR2
HSPA9
RCN3
GSTM1
SH3GLB1
HP
AGFG1
PLEKHA1
SNRPD2
PLIN3
ADGRE3
GRAMD1A
GK
SLC25A4
KYNU
ST8SIA4
KRTAP19-6
HSPA1A
NPM1
MARCKS
SOCS3
IRF2BPL
LY96
BCL11B
BPI
RPL3
CYSTM1
RGS18
TMEM120A
GIMAP7
TSPO
LITAF
ARHGEF40
MTHFS
HSPH1
HIST1H3D
MCTP2
ABCF1
FLOT1
ALOX15
CCR6
FCGR3A
WLS
SULT1A2
SHKBP1
ZFP90
CARD11
BEX2
NDST1
FAM160B1
HIST1H2BD
DHRS13
LAG3
KIAA1147
DICER1
TDRD9
LYAR
GBA
PRF1
PRKAR1A
PHTF1
B9D2
RRAGD
NAT10
TCEA3
CNIH4
ACAP2
ST6GAL1
BAZ1A
PLSCR1
SPOCK2
SH3BP5L
C12orf57
PLOD1
GFI1
ATP8B2
PRKCQ
H3F3AP4
ASGR2
GNAQ
SYTL3
RALB
IL1R2
RNF24
B3GNTL1
CYBRD1
IL7R
RPS6
LIMK2
NIN
EXTL3
MYBPC3
RPGRIP1
ZNF467
CNST
TTC3
IVNS1ABP
SEMA4A
RB1CC1
STXBP2
UBE2G2
SH2B2
ATP6V1C1
GTPBP3
KIDINS220
LAMTOR3
NQO2
LRRK2
PLB1
ADRB2
PRAM1
TXN
CDA
RPL5
GPR68
CD79A
TRAF5
IL17RA
TNFRSF10C
MCL1
VCAN
MGST1
LILRA3
ZYX
SLPI
UTS2
KLHL3
ALPK1
CRK
ZNF831
LOC101930164
ITGAX
TMIGD3
GPBAR1
ARAP3
GPR183
IFNAR1
BCL11A
FPR2
SLC45A4
NDUFB2
PBDC1
SYTL2
USP15
PSG11
ESYT2
MFN2
FOLR3
HEBP2
PSG9
HIST1H4H
CTSD
SLC43A2
ABLIM1
CCDC88B
IL4R
GRN
PRKCH
HIST1H2AC
OSGIN2
SLC25A37
TIAM2
SIGLEC5
TARP
KIAA0319L
GZMB
ITK
FNBP4
CRIP1
RAB32
LRG1
HOXB2
CXCR2
NCF1C
PTGDR2
LOC105747689
TREM1
FCGR1A
ADGRG1
TLR5
KDM2B
JUP
RPL27
RPL17
IGLL1
ARID3A
RPL39
MYADM
CXCR1
EGLN1
RPS14
ATF5
LYPD2
MAGED1
ESYT1
RPS26P11
CCR7
LCN2
LBH
FAM198B
GOLGA8B
CD8A
DHRS12
RPL35A
RPL22
CD5
C19orf38
GNG10
ABCA7
G6PD
HAUS4
CEACAM8
ITPR3
JADE2
FAM101B
IL1RN
HSPA6
ANKRD22
KRT23
HES4
UBASH3A
FAM129A
RPS23
HIST2H2AC
GTF2IP1
CD27
DCP2
COX7C
GSTM2
CAPZA2
S100A11
TREML2
TGFBR3
FCGBP
H2AFJ
KCNJ2
DAAM2
GPR84
PARP1
CACNG6
TRAT1
PGGHG
DNMT1
AKR1C3
HLX
RGCC
LOC107987345
USP32
