# Supplementary material for: Identification of potential biomarkers and therapeutic targets in the chronic obstructive pulmonary disease and acute myocardial infarction
Source: Research Square preprint supplement (doi:10.21203/rs.3.rs-166478/v1), 2021-02-08
Supplement: Supplementary file 4 [file d8c18498c9cc0919f802338f.xlsx]

## Sheet: Sheet1
Gene.symbol
HNRNPA0
PHF5A
DLST
SLC43A2
HRASLS5
TNFRSF1A
PDAP1
TMEM201
CHMP4B
CACUL1
MAN2A1
RPN1
TRAF7
PSMD3
CAND1
DRICH1
KIF1C
FAM96B
PPIAL4A
SLC20A2
GLTSCR1
TWISTNB
BCL7B
RPL24
LRIG1
APOL6
RAB35
SURF4
TEP1
TRA2B
DYNC1H1
DNAJC7
ORAOV1
PGK1
RAB13
TAF5L
EPT1
TDRD10
SHROOM1
FGFR1
ZNF678
SLC39A7
MAOB
RNF166
KIAA1033
BAX
FUNDC2
PTMA
TARDBP
NACC1
SRSF4
C14orf1
ZNF264
LMNB1
MBD4
TXNL4A
HOOK3
ACTR3
PPP3R1
POLR2C
ANXA5
SRP72
IQGAP2
E2F4
CCDC57
CCDC137
SMG1P5
SDC1
NPIPA1
UPF1
RMDN1
AFF4
YAP1
METTL7A
MARS
HSP90B1
ZRANB2
ATM
RPL17
ZC3H7B
PFKFB3
NPIPB3
MAEA
ATP5S
NPIPB6
NPHP4
MIER1
F8A1
TBC1D9
RHO
BORCS8
ZNF728
PVR
NBPF14
H2AFX
AP3M1
SLC7A8
SMURF1
FAM193A
ITGB1
FBXO31
SRP19
RNF125
NPIPB5
UBR1
CYP4V2
PCNP
MKKS
NPTN
PRRG4
VPS41
RNASE1
PRRC1
ZNF652
ERBB2
PTPN18
CREB3L4
SLC25A22
COX5A
CYCS
PSMB7
LMNB2
UPF3A
GSN
CSNK1D
PFDN6
CCR3
LAMP1
LOC100128164
LTBP2
LRP5L
AKIRIN1
CLN8
YWHAZ
EIF1B
SMARCAD1
ALKBH5
TALDO1
PPIB
HEXA
TRIM13
HMGN5
PTPN1
TNRC6B
INMT
IFT20
RASSF8
LARP1B
ZYG11B
RSL1D1
SLC35E2B
SNORA70
LSM12
RGL2
ARHGEF15
PAX4
GNG13
GNAZ
ZNF506
TAOK1
SREK1
MAGED2
TNXB
CASP8
TMEM43
CCDC71
MAPKAPK3
PPP4R2
FUS
ABHD17A
QTRT1
BPNT1
JMJD1C
STK32C
MTHFR
CEP290
PPP1CB
AGPS
R3HCC1L
SMCHD1
NBPF3
PPM1K
ADIRF
LOC780529
ACSL5
NAIP
FHL1
THAP9-AS1
CBY1
ZNF738
CPT2
LOC100132217
MACC1
PIP4K2C
CYB561
CCDC91
C1QTNF7
ZNF675
SEPT14
SYT11
LOC146880
PCMTD2
ZNF23
PTPN11
NOTCH3
GDE1
LTC4S
PFAS
NGLY1
EWSR1
UNK
CABIN1
RPS3A
GNL3L
MEGF6
ITGB2
HSPA2
DST
LIN9
BOLA3
SBF2
TMED9
ZFP62
NPM1
TLCD2
TPM1
ANKRD6
CRKL
ATG4B
MAP9
KIAA0319L
HCRT
SMAD7
ZNF714
ZCCHC2
DNM3OS
ST6GALNAC5
NR2F2
SFTPA1
FOLR1
APAF1
MBNL2
GLTSCR1L
ERF
CLMP
SVIL
MGEA5
NDFIP1
SLC4A7
RBM27
LIMK1
APOBEC3F
DKK3
PADI3
SLIT2
PDLIM5
KANK1
ARHGAP26
RPL19
EXOC5
HIST1H2AM
CCDC186
LOC441666
MCL1
CACNA1H
CNST
AMD1P3
RPL5
LARP4
GLIDR
DTX3
IGSF6
SF3A1
TCEAL4
PHF1
HIRA
MGA
NFIA
MAVS
CTSS
TMEM120B
ITPRIPL2
GOLGA8A
IFI16
CROCCP3
ROCK2
APBB1IP
PTPRE
SLC18B1
CBX6
LTBP4
SWAP70
MED23
NBPF10
PRKCDBP
RAD23B
DACT3
MMS19
HAVCR2
SMARCA2
ZNF174
PAK1IP1
ANKRD11
ZNF117
PRRT2
CSRP1
LINC01089
SCNM1
CAPZA2
UBQLN1
TSPAN9
ARHGAP29
LILRB1
PITPNB
ZEB2
RAB1B
DRAM1
MAPK13
LIMS2
HIST1H2AB
ARHGEF10L
UNC93B1
DYRK2
TRIM41
CHST2
HP1BP3
EEF1A1
TRPV1
ZNF426
GNA11
GAGE3
KPNA6
SCD5
C18orf32
CEP162
DDR2
MTURN
MAGOH
GABBR1
IP6K2
APOBEC3C
ZNF213-AS1
GPR20
F11R
MLLT6
PIH2
ANXA2P3
DNAJC10
ACTB
ZNF587
FN1
CLU
SKIL
PLEKHH3
C2orf54
ANXA6
HIF1A
PPFIBP1
ADH1A
VPS26B
MED18
SEC14L1
HEG1
TMEM74B
ZNF254
DOHH
HNRNPAB
PIM1
C1GALT1
S100A9
RNF145
CD300A
TMEM258
TGFBR1
CLVS1
RAB23
ZNF395
ALG6
RALA
FKBP10
CUL2
CPA3
ZNF626
ADD1
ANO8
TBX5-AS1
MAT2B
SYNE2
AGTR1
ECE1
SNHG20
TMEM243
TRIM14
MAF
JADE1
PHLDA3
ZNF280D
KIT
NBPF9
CYBRD1
CXorf23
CHRM2
NPM3
SLC6A19
RND1
TPM2
TMPO
PLN
MATN2
MST1
OLIG3
NPNT
HOXB4
NOC2L
HM13
GTF2IP20
NBPF19
NAF1
AQP4
MYH11
MYO5A
LINC01290///EMP2
PKD2
JMJD6
SETBP1
SEMA5A
AGRN
HGS
IER3IP1
RRP7A
C14orf37
SERPINB9
GAS8
OPN1LW
LMO7
SMAP2
EMD
SPTLC2
LOC105377924
CAV1
JPH2
AMOTL1
MRTO4
ADH1C
PML
CDC42EP2
PRPF19
CYP2A7P1
PHLDA2
BMP7
NCKAP1
CBWD5
OLFML3
PI16
PABPC4L
PDXDC2P
SGCE
RAB20
OGT
ZACN
RERG
GPC3
FAT4
ID3
HOXA2
RANBP6
DUT
SPSB2
HIST1H4B
JUNB
FILIP1L
IL33
PBX1
EFCAB7
CKLF
POLR1E
PBX2
HK3
FRAS1
SLC52A2
FIBIN
HDAC1
AGBL1
PRDM6
JAKMIP3
PRKAR2A
ANO1
MSC
NTF3
LUC7L3
DENND4A
TMEM200C
SPARCL1
GOLGA6A
LMCD1
NEDD4
SMG7
LOC100131131
MMP14
ASPHD1
TUFM
CCDC77
SLC35A1
ARHGEF10
LRRC45
SNAI1
CHI3L1
MYOZ1
ACTBL2
PIGY
MPHOSPH8
MARK1
LAD1
CES1
YPEL2
MNT
TUBB
HRH1
ACTN3
KCNH7
ARNTL2
CCND2
CIITA
ANKRD36BP2
LGR4
ZIM2///PEG3
PPP1R14A
SOX4
PMAIP1
DENND4B
CMKLR1
ANKRA2
NOV
CYHR1
F2
CHRM3
DPT
PLEKHA2
C1orf105
ZNF572
SEPT7P2
ANKMY2
HFE
NBPF11
PEX10
F8
WLS
GAPDH
ARL4C
PPARGC1A
EIF5
B3GALNT1
HSPD1
ZNF575
PCDH18
TCAF1
MS4A2
ST6GALNAC3
TMEM178A
GDF10
B4GALT5
URB2
COLGALT2
LRRC2
ZNF177
POLR3E
LEFTY2
IER3
SLC25A25
MGC70870
CASQ2
MAP3K3
FOXE1
PPP1R3C
CEACAM7
CDKN1A
TNFAIP3
KRT8
DUSP15
GABRE
NOTCH2NL
CIRBP
FSTL1
RGS5
SVEP1
ALDH18A1
NKX2-8
FAM63A
CDH6
TRIL
CD86
KRT4
L1TD1
GPM6A
BAG3
PKD1
SSPN
BCL2A1
SPP1
NEK3
BMPR1B
MYZAP
MXD1
WFDC1
C5AR1
HSP90AA1
ZNF451
KLHL23
GALNT18
AGER
GOLGA3
LOC100507131
RDH10
HMGB3P1
PLEKHH2
PCM1
RPL23AP32
CCDC191
PHLDA1
FAM162B
PLVAP
PTPRD
SH3GL3
ITGA2
LAX1
IFIT1
ITGA7
FAM117B
CNN1
ATP1B2
TCF21
BCL10
NMNAT3
SOD2
RRAD
DES
CHRDL2
MEF2D
PCDHB9
OSM
PSORS1C2
OGN
FOLH1
WNT5A
PER3
CCDC3
NCR2
ACTG2
SBSPON
SFTPA2
RMDN3
HIST1H2AJ
TMEM158
AEBP1
ZBED8
ACBD4
ADAMTS4
ATP1A2
CKAP2
ENPP4
MFAP4
LMOD1
CCL19
BCHE
NCOA7
GPD1
CSTF2T
TNNT2
CDH3
IQCD
PFKL
SOSTDC1
COL21A1
PCDH7
BCAT1
DPP6
HSPB3
BRINP3
COL4A1
TUBB8
RRP12
H6PD
IRS2
CCR1
GBP6
CD70
SLCO1A2
FENDRR
PLA2G1B
VPS18
ACTA2
OMD
FCN2
SLC7A5
MAPT-AS1
SYNPO
IRX3
EGFL7
RAPGEF5
SEMA6D
ECM2
DUSP2
S100B
FKBP1A
C1QTNF5
APOBEC3A
PTCH1
SERTAD1
LDB2
ANGPT1
CXCL8
IGHM
TUBB3
MMP9
CXCL12
AMOTL2
DDC
TBC1D31
ADGRB3
MYB
KCNK17
CYP3A7
F5
GLT1D1
RAP1GAP
CYP3A4
MYRIP
CYP1B1
RSPO3
CTGF
ART4
HMOX1
MMP19
ITPKC
ALPL
NR4A2
NFKBIZ
CAPS2
ALAS2
KRT7
ZNF429
AKAP12
LRRC36
TYRP1
SRGN
FAM166B
LIF
LMO2
BOLA3-AS1
CABP7
CMIP
IL2RA
GRM8
NUAK2
MT1F
IL6
SOCS3
DNASE1L3
ZC3H12A
HSPB9
ABCG2
LINC01589
FBRSL1
CXCR6
SCN4B
ZBED2
EFCC1
CFAP100
BHLHA15
LTK
PLA2G2A
FCN1
LILRB2
PF4
FAM65B
SP5
CCR6
GDF15
GRB14
CACNA1E
HSPC324
PCOLCE2
KLF16
GFPT2
SECTM1
CWH43
PTPRB
SLITRK6
LRRC74B
HSD17B1
IL1B
CH25H
MIR7515HG
COL14A1
STC2
DMD
CCDC144A
PPP6R1
ENPP2
RGS22
GADD45B
ELL2
ITLN2
MCAM
NEUROG1
CSRNP1
CHI3L2
ANKDD1A
HRK
FGFBP2
CENPN
ZSCAN10
ACAN
CRISPLD2
KCNA5
MYOC
IL1RN
KLF15
ID4
EMP1
NOS1
MT1M
GPC6
CD48
KRTAP4-1
TFF3
WDR33
ANKRD22
PLA2G7
GJB2
CREM
MMP1
SMARCA4
NKD2
DKK2
IL1R2
CGB1
RSPH10B
RGL4
GAS1
RGS1
MYH2
PSPH
ASPN
AADAC
IGLV6-57
PTGS2
EFHB
LOC286272
CNTN1
CYP26B1
IRX5
CCL20
ATF3
FDCSP
MYCN
NRSN2
MT1L
SLCO4A1
SOX8
BDKRB1
LMF1
SHC2
SLAMF7
CLDN1
S100A8
LRRN3
MT2A
SERPIND1
RPA4
C15orf48
TMEM100
CFAP45
CCDC17
ZBBX
PIP5K1C
FLJ35934
TRIM35
RBM22
FOXJ1
FAM101A
STEAP1
SLC51B
THBS1
TNFAIP6
MYC
PPM1F
GSTA2
EFL1
CLEC4E
PIK3R5
PTX3
POU2AF1
LRRC46
IGF1
CFAP157
CRHR2
LOC649294
SYT15
SLC45A4
CHIT1
RTKN2
MT1H
CCL8
HPR
S100A12
MAP4K3
EFCAB1
AGBL2
SFN
CLC
NTM
C2orf83
GSTA5
SPPL2B
SPAG8
KIAA0226L
MEDAG
C2CD4B
CAPS
SOX2
CT45A5
KIAA2012
CXCL13
HAS1
MT1G
CFAP206
FKBP5
AKAP14
NR4A1
ENKUR
SAA1
UBD
CSF3
MT1E
CCL2
PRSS36
